# Supplementary material for: How Sociotechnical Realignment and Sentiments Concerning Remote Work are Related – Insights from the COVID-19 Pandemic
Source: Springer Nature journal article supplement (doi:10.1007/s12599-023-00798-8), 2023-03-24

# **How Sociotechnical Realignment and Sentiments Concerning Remote Work are Related – Insights from the COVID-19 Pandemic**

**Vanessa Kohn, Muriel Frank, Roland Holten**

Business & Information Systems Engineering (2023)

**Appendix (available online via <http://link.springer.com>)**

## Appendix

### Appendix A: Complete list of all Q sort statements

| #  | Q sort statements (translated into English by a professional translator)                                                                   | Potential aspects of STS alignment | Source                                       | STS framework component |
|----|--------------------------------------------------------------------------------------------------------------------------------------------|------------------------------------|----------------------------------------------|-------------------------|
| 1  | I talk to my colleagues via video or voice call on a daily basis.                                                                          | OTS1                               | Sarkar et al. (Sarkar et al. 2017)           | Social                  |
| 2  | I sometimes have informal calls with my colleagues to talk about nonwork-related topics.                                                   | OTS2                               | Sarkar et al. (Sarkar et al. 2017)           | Social                  |
| 3  | Fulfilling my work tasks is highly interdependent with the work of others.                                                                 | OTS3                               | Eckhardt et al. (Eckhardt et al. 2019)       | Social                  |
| 4  | I still collaborate with my colleagues, but it feels more orchestrated and less spontaneous.                                               | OTS4                               | Waizenegger et al. (Waizenegger et al. 2020) | Social                  |
| 5  | I am more likely to participate in informal Friday afternoon meetings because I don't need to worry about being late home from the office. | OTS5                               | Waizenegger et al. (Waizenegger et al. 2020) | Humanistic              |
| 6  | I feel more connected to my colleagues than I ever did before.                                                                             | OTS6                               | Waizenegger et al. (Waizenegger et al. 2020) | Social                  |
| 7  | Since working from home, I have more contact at work with people I normally interact less with.                                            | OTS7                               | Waizenegger et al. (Waizenegger et al. 2020) | Social                  |
| 8  | My manager tracks my performance when working remotely.                                                                                    | OMS1                               | Eckhardt et al. (Eckhardt et al. 2019)       | Instrumental            |
| 9  | I feel like my managers do not provide any emotional support during the COVID-19 pandemic.                                                 | OMS2                               | Eckhardt et al. (Eckhardt et al. 2019)       | Social                  |
| 10 | My managers helped me understand the differences in communication, technology, and self-discipline when transitioning to remote work.      | OMS3                               | Eckhardt et al. (Eckhardt et al. 2019)       | Social                  |
| 11 | I know exactly when and how to reach my managers when working remotely.                                                                    | OMS4                               | Eckhardt et al. (Eckhardt et al. 2019)       | Social                  |
| 12 | My manager continuously ensures me I can be productive at home.                                                                            | OMS5                               | Wade and Shan (Wade and Shan 2020)           | Social                  |
| 13 | My manager communicates precise and realistic objectives to me.                                                                            | OMS6                               | Wade and Shan (Wade and Shan 2020)           | Social                  |

|    |                                                                                                   |      |                                                        |              |
|----|---------------------------------------------------------------------------------------------------|------|--------------------------------------------------------|--------------|
| 14 | Management asked for my feedback on how to optimize my remote work experience.                    | OMS7 | Sakurai and Chughtai (Sakurai and Chughtai 2020)       | Social       |
| 15 | I participated in workshops on data protection or IT security.                                    | OTT1 | Sarkar et al. (Sarkar et al. 2017)                     | Joint        |
| 16 | My organization offered training to prepare for the new network structures when working remotely. | OTT2 | Eckhardt et al. (Eckhardt et al. 2019)                 | Joint        |
| 17 | My organization offers tool training.                                                             | OTT3 | Eckhardt et al. (Eckhardt et al. 2019)                 | Joint        |
| 18 | My company provided me with the necessary equipment to be able to work from home.                 | OTT4 | Scheepers and Middleton (Scheepers and Middleton 2013) | Technical    |
| 19 | Working from home makes it hard to comply with my organization's information security policies.   | OTT5 | Li and Siponen (Li and Siponen 2011)                   | Joint        |
| 20 | Making use of workarounds with respect to security rules is fine during a pandemic.               | OTT6 | Anderson and Agarwal (Anderson and Agarwal 2010)       | Joint        |
| 21 | I care a lot about protecting my data.                                                            | ISC1 | Sarkar et al. (Sarkar et al. 2017)                     | Joint        |
| 22 | I am worried about security risks when working from home.                                         | ISC2 | Sarkar et al. (Sarkar et al. 2017)                     | Joint        |
| 23 | I can get my tasks done much faster when working from home.                                       | IPP1 | Waizenegger et al. (Waizenegger et al. 2020)           | Instrumental |
| 24 | I feel like remote work is a barrier to learning new things at work.                              | IPP2 | Waizenegger et al. (Waizenegger et al. 2020)           | Instrumental |
| 25 | It is challenging for me to manage non-work-related sources of stress while working from home.    | ITS1 | Eckhardt et al. (Eckhardt et al. 2019)                 | Humanistic   |
| 26 | I experience more technostress since working from home.                                           | ITS2 | Eckhardt et al. (Eckhardt et al. 2019)                 | Humanistic   |
| 27 | When something doesn't go right at work, I take out my anger on the people living with me.        | IWH1 | Benlian (Benlian 2020)                                 | Humanistic   |
| 28 | When I successfully complete a task at work, I share my good mood with the people living with me. | IWH2 | Benlian (Benlian 2020)                                 | Humanistic   |
| 29 | Unscheduled work calls invade my privacy at home.                                                 | IWH3 | Waizenegger et al. (Waizenegger et al. 2020)           | Humanistic   |

|    |                                                                                                                     |      |                                            |            |
|----|---------------------------------------------------------------------------------------------------------------------|------|--------------------------------------------|------------|
| 30 | I still don't know a lot of functions of the tools I use to work from home.                                         | ISE1 | Sarker et al. (Sarker et al. 2017)         | Technical  |
| 31 | I could complete my job using a new software package if I had never used one like this before.                      | ISE2 | Wang and Haggerty (Wang and Haggerty 2011) | Technical  |
| 32 | Sometimes I set my status to unavailable when I don't want to be reached.                                           | IDW1 | Eckhardt et al. (Eckhardt et al. 2019)     | Humanistic |
| 33 | I often feel bad when I don't answer messages immediately.                                                          | IDW2 | Eckhardt et al. (Eckhardt et al. 2019)     | Humanistic |
| 34 | It is important for me to be up to date about technological trends.                                                 | IPB1 | Sarker et al. (Sarker et al. 2017)         | Humanistic |
| 35 | I don't actively search for news on technological developments.                                                     | IPB2 | Sarker et al. (Sarker et al. 2017)         | Humanistic |
| 36 | I don't feel comfortable turning on my camera in large online meetings.                                             | IPB3 | Sarker et al. (Sarker et al. 2017)         | Humanistic |
| 37 | The idea of living in a digitalized world is repulsive to me.                                                       | IPB4 | Sarker et al. (Sarker et al. 2017)         | Humanistic |
| 38 | I immediately understood the need to shift to remote work during the pandemic.                                      | IPB5 | Sarker et al. (Sarker et al. 2017)         | Humanistic |
| 39 | Without separate interests, I think it's harder to make use of the advantages that come with full-time remote work. | IPB6 | Eckhardt et al. (Eckhardt et al. 2019)     | Humanistic |
| 40 | I believe remote work plays an important role in a modern society.                                                  | IPB7 | Raghuram et al. (Raghuram et al. 2010)     | Humanistic |

OTS = Team support

OMS = Management support

OTT = Technical support / training

ISC = Security concerns

IPP = Perceived performance

ITS = Technostress

IWH = Work-home conflict

ISE = Self-efficacy

IDW = Digital well-being

IPB = Personal belief / preference

## **Additional References in Appendix A**

Anderson CL, Agarwal R (2010) Practicing safe computing: a multimethod empirical examination of home computer user security behavioral intentions. *MIS Q* 34:613–643.  
<https://doi.org/10.2307/25750694>

Li Y, Siponen M (2011) A call for research on home users' information security behaviour.  
In: *Proceedings of the 16th Pacific Asia Conference on Information Systems*. Brisbane

Raghuram S, Tuertscher P, Garud R (2010) Mapping the field of virtual work: a co-citation analysis.  
*Inf Syst Res* 21:983–999. <https://doi.org/10.1287/isre.1050.0050>

Scheepers R, Middleton C (2013) Personal ICT ensembles and ubiquitous information systems environments: key issues and research implications. *Commun Assoc Inf Syst* 33:381–392.  
<https://doi.org/10.17705/1CAIS.03322>

## Appendix B: Modifications to automatic sentiment score

| Participant's comments on their remote work experience                                                                                                                                                                                                                               | VADER score    | Modified score | Explanation for modification |
|--------------------------------------------------------------------------------------------------------------------------------------------------------------------------------------------------------------------------------------------------------------------------------------|----------------|----------------|------------------------------|
| Everything has its advantages and disadvantages. It is important to have a job at all.                                                                                                                                                                                               | <b>0.1531</b>  | <b>0.0</b>     | <b>(2)</b>                   |
| More mixed. I see clear advantages: Saving time, more equal meetings, better compatibility of professional and private concerns. What I miss most of all are the personal meetings and contacts.                                                                                     | <b>0.7553</b>  | <b>0.0</b>     | <b>(2)</b>                   |
| Creative work works worse than face-to-face contact. I still find it much more productive than in the office, where one is constantly "harassed".                                                                                                                                    | <b>-0.5423</b> | <b>0.3</b>     | <b>(1)</b>                   |
| A good thing, if you only had the equipment (own study, sufficiently fast Internet).                                                                                                                                                                                                 | <b>0.4404</b>  | <b>0.0</b>     | <b>(2)</b>                   |
| In certain phases this can be quite useful, but in the long run, office work cannot be adequately replaced by the home office.                                                                                                                                                       | <b>0.3912</b>  | <b>0.0</b>     | <b>(2)</b>                   |
| I actually don't care where I work from. But it would be nice to have the choice. This is not given with a current office capacity of 25%. Here, I leave the priority to colleagues who do not have the infrastructure at home, e.g. a separate study.                               | <b>0.379</b>   | <b>0.0</b>     | <b>(2)</b>                   |
| Working from home benefits many people, for example if you have appointments or children, because it allows you to work more flexibly. But I think that after the pandemic more people should work in the office again, because the group feeling is stronger and that is important. | <b>0.799</b>   | <b>0.0</b>     | <b>(2)</b>                   |
| Even though the home office has many advantages and I can work more efficiently, I lack the social and personal interaction with colleagues. Especially because I live alone, I quickly become lonely.                                                                               | <b>-0.2458</b> | <b>0.0</b>     | <b>(2)</b>                   |
| In Corona times, home office is a sensible and necessary measure, but if I could choose it, I would usually want to work in the office.                                                                                                                                              | <b>0.1154</b>  | <b>0.0</b>     | <b>(2)</b>                   |
| Very good, because I save an hour of commuting time. At the same time, I was afraid of being more closely monitored. I was unsure whether I would not be less productive. And I wondered how I should work with the equipment I have.                                                | <b>0.659</b>   | <b>0.0</b>     | <b>(2)</b>                   |
| couldn't imagine that the established "paper processes" would also work digitally\ - but: I was able to reconcile family and career better immediately.                                                                                                                              | <b>0.5927</b>  | <b>0.0</b>     | <b>(2)</b>                   |
| On the one hand, I felt a little insecure because of the change and at first I felt overwhelmed with the new tasks and procedures, on the other hand, I felt relieved and more confident that I could stay at home more because of the health situation.                             | <b>0.8803</b>  | <b>0.0</b>     | <b>(2)</b>                   |
| I was sympathetic because at the beginning of the pandemic I was very worried about becoming infected with SARS-COV 2 and wanted to isolate myself.                                                                                                                                  | <b>-0.4927</b> | <b>0.3</b>     | <b>(1)</b>                   |

|                                                                                                                                                                                                                               |                |             |            |
|-------------------------------------------------------------------------------------------------------------------------------------------------------------------------------------------------------------------------------|----------------|-------------|------------|
| The situation was initially very unfamiliar to me, as working from home did not play a role in my company before.                                                                                                             | <b>0.2584</b>  | <b>0.0</b>  | <b>(2)</b> |
| Very unsafe!                                                                                                                                                                                                                  | <b>0.0</b>     | <b>-0.3</b> | <b>(3)</b> |
| It's an unusual feeling, since I only started working after Corona had been in progress for a while, which meant that I didn't get to know many colleagues personally. This makes it very difficult to integrate into a team. | <b>0.1298</b>  | <b>-0.3</b> | <b>(3)</b> |
| It wasn't a big emotional change for me, since I had already done most of my work from home before Corona.                                                                                                                    | <b>-0.1139</b> | <b>0.0</b>  | <b>(2)</b> |
| I was happy that I now have more freedom to organize my daily work routine but was also afraid of social isolation, especially because I live alone.                                                                          | <b>0.2391</b>  | <b>0.0</b>  | <b>(2)</b> |
| safer, more isolated, detached from the team, but as a risk patient had no alternative.                                                                                                                                       | <b>-0.6942</b> | <b>0.0</b>  | <b>(2)</b> |

**Explanation Index**

(1) The comment contains only positive feelings toward remote work. The algorithm did not understand the context or negotiation of negative words correctly. We manually changed the score to 0.3 to indicate a positive sentiment (Domagalski 2020).

(2) The comment either contains a well-balanced mix of positive and negative sides of remote work leading to a neutral overall score or only states a neutral fact such as familiarity with remote work prior to the pandemic.

(3) The comment contains only negative feelings toward remote work. We manually changed the score to -0.3 to indicate a negative sentiment (Domagalski 2020).

**Appendix C: Testing control variables**

| <b>Fisher's Exact Test</b> |                  |
|----------------------------|------------------|
| Age                        | p-value = 0.8387 |
| Gender                     | p-value = 0.2953 |
| Education                  | p-value = 0.9352 |
| Marital status             | p-value = 0.0438 |
| Living situation           | p-value = 0.1492 |
| Type of employment         | p-value = 1.0000 |
| Month                      | p-value = 0.4817 |

| <b>Contingency Table of Marital Status by Groups</b> |               |                                |                            |              |
|------------------------------------------------------|---------------|--------------------------------|----------------------------|--------------|
|                                                      | <b>Single</b> | <b>Relationship or married</b> | <b>Divorced or widowed</b> | <b>Total</b> |
| High STS alignment group                             | 8             | 17                             | 1                          | 26           |
| Low STS alignment group                              | 9             | 3                              | 0                          | 12           |
| Total                                                | 17            | 20                             | 1                          | 38           |

**Appendix D: Testing assumptions of linear regression for (Sentiments ~ Factor Loadings)**

**(Sentiments ~ Loadings on Factor 1)**

| <b>Durbin-Watson-Test</b> |                        |                      |                |
|---------------------------|------------------------|----------------------|----------------|
| <b>Lag</b>                | <b>Autocorrelation</b> | <b>D-W Statistic</b> | <b>p-value</b> |
| 1                         | -0.1509978             | 2.28181              | 0.386          |

| <b>Breusch-Pagan test</b> |           |                |
|---------------------------|-----------|----------------|
| <b>BP</b>                 | <b>df</b> | <b>p-value</b> |
| 1.194                     | 1         | 0.2745         |

| <b>Collinearity Statistics</b> |   |
|--------------------------------|---|
| <b>VIF</b>                     |   |
| Loadings1                      | 1 |

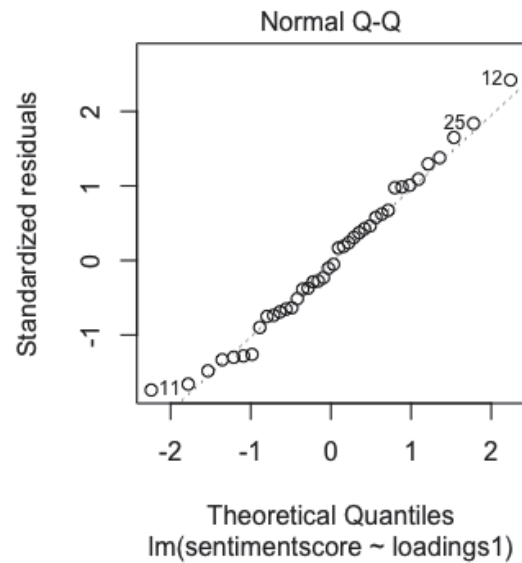

**(Sentiments ~ Loadings on Factor 2)**

| <b>Durbin-Watson-Test</b> |                        |                      |                |
|---------------------------|------------------------|----------------------|----------------|
| <b>Lag</b>                | <b>Autocorrelation</b> | <b>D-W Statistic</b> | <b>p-value</b> |
| 1                         | -0.1649922             | 2.325687             | 0.296          |



| Breusch-Pagan test |    |         |
|--------------------|----|---------|
| BP                 | df | p-value |
| 0.26924            | 1  | 0.6038  |

| Collinearity Statistics |     |
|-------------------------|-----|
|                         | VIF |
| Loadings2               | 1   |

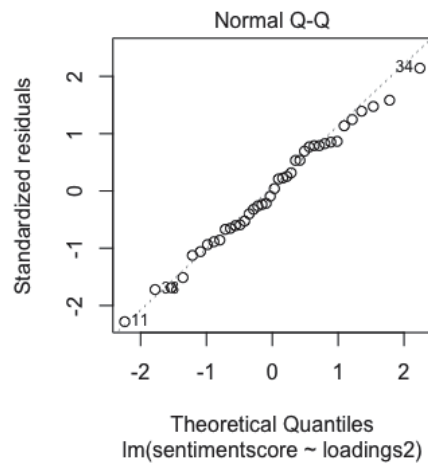

**Appendix E: Testing assumptions of linear regression for (Personal Digital Resilience ~ Loadings on Factor 2)**

(Personal Digital Resilience ~ Loadings on Factor 1)

| <b>Durbin-Watson-Test</b> |                        |                      |                |
|---------------------------|------------------------|----------------------|----------------|
| <b>Lag</b>                | <b>Autocorrelation</b> | <b>D-W Statistic</b> | <b>p-value</b> |
| 1                         | 0.04660695             | 1.894073             | 0.684          |

| <b>Breusch-Pagan test</b> |           |                |
|---------------------------|-----------|----------------|
| <b>BP</b>                 | <b>df</b> | <b>p-value</b> |
| 0.4013                    | 1         | 0.5264         |

| <b>Collinearity Statistics</b> |            |
|--------------------------------|------------|
|                                | <b>VIF</b> |
| Loadings1                      | 1          |

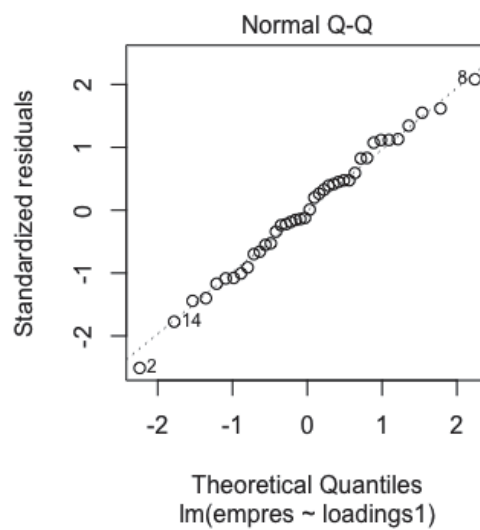

(Personal Digital Resilience ~ Loadings on Factor 2)

| <b>Durbin-Watson-Test</b> |                        |                      |                |
|---------------------------|------------------------|----------------------|----------------|
| <b>Lag</b>                | <b>Autocorrelation</b> | <b>D-W Statistic</b> | <b>p-value</b> |
| 1                         | 0.02589249             | 1.88883              | 0.72           |

| <b>Breusch-Pagan test</b> |           |                |
|---------------------------|-----------|----------------|
| <b>BP</b>                 | <b>df</b> | <b>p-value</b> |
| 0.038928                  | 1         | 0.8436         |

| <b>Collinearity Statistics</b> |   |
|--------------------------------|---|
| <b>VIF</b>                     |   |
| Loadings2                      | 1 |

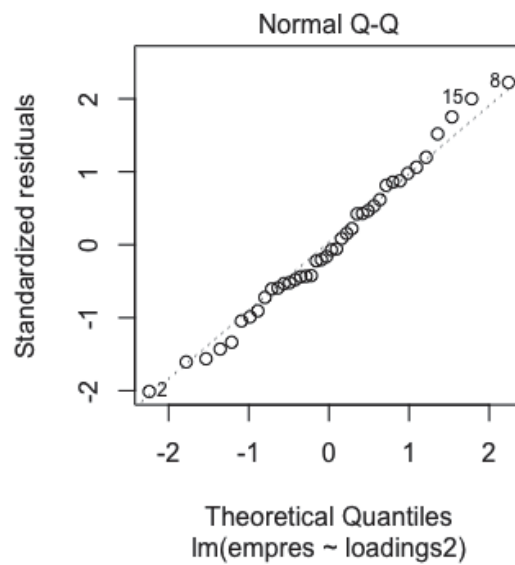

**Appendix F: Testing assumptions of linear regression for (Sentiments ~ Resilience)**

| <b>Durbin-Watson-Test</b> |                        |                      |                |
|---------------------------|------------------------|----------------------|----------------|
| <b>Lag</b>                | <b>Autocorrelation</b> | <b>D-W Statistic</b> | <b>p-value</b> |
| 1                         | -0.1095363             | 2.174439             | 0.52           |

| <b>Breusch-Pagan test</b> |           |                |
|---------------------------|-----------|----------------|
| <b>BP</b>                 | <b>df</b> | <b>p-value</b> |
| 0.16822                   | 1         | 0.6817         |

| <b>Collinearity Statistics</b> |   |
|--------------------------------|---|
| <b>VIF</b>                     |   |
| Resilience                     | 1 |

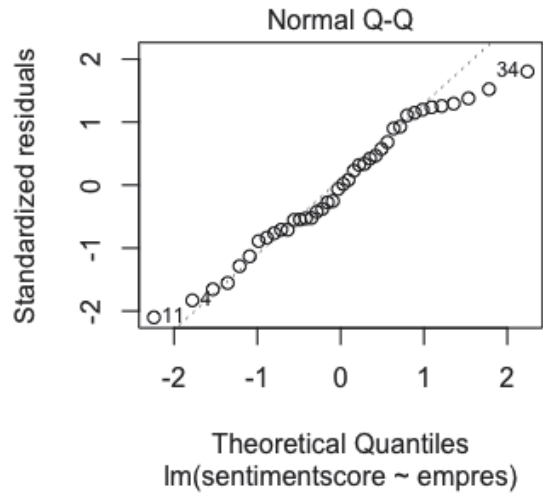

Supplement: MOESM1 [file 24674620]
